# Supplementary material for: Lipid peroxidation in diamond supported bilayers
Source: Royal Society of Chemistry journal article supplement (doi:10.1039/d3nr01167d), 2023-01-01
Supplement: d3nr01167d1.pdf [file d3nr01167d1.pdf]

Supplementary Information:

# Lipid peroxidation in diamond supported bilayers

A. R. Ortiz Moreno<sup>1#</sup>, R.Li<sup>1#</sup>, K. Wu, R. Schirhagl<sup>\*1</sup>

1. Groningen University, University Medical Center Groningen, Antonius Deusinglaan 1, 9713 AW Groningen, the Netherlands

E-mail corresponding author:

[romana.schirhagl@gmail.com](mailto:romana.schirhagl@gmail.com)

# these authors contributed equally

## 1. Relaxometry curves

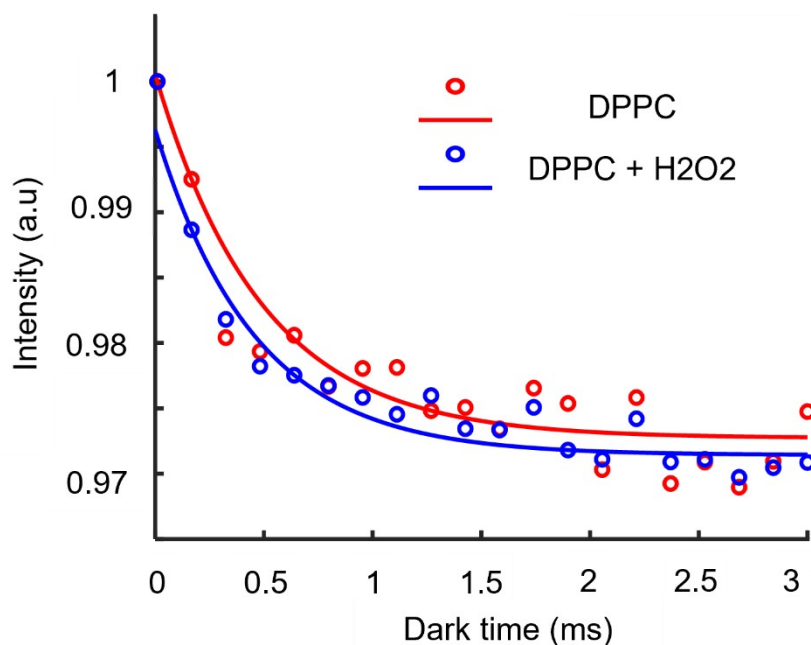

Figure S1: Relaxometry curves for the DPPC measurements (Data in dots, exponential fit in the continuous line).

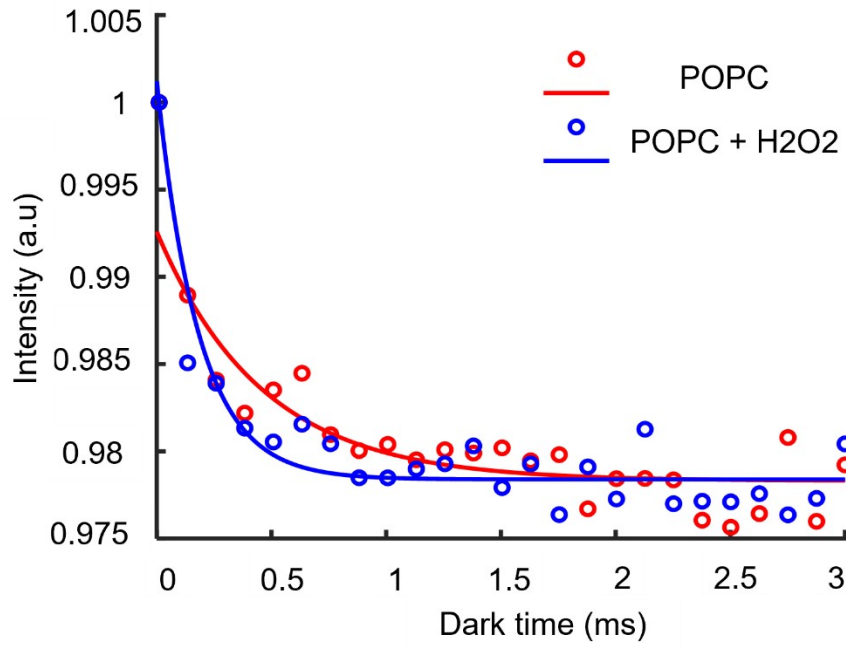

Figure S2: Relaxometry curves for the POPC measurements (Data in dots, exponential fit in the continuous line).

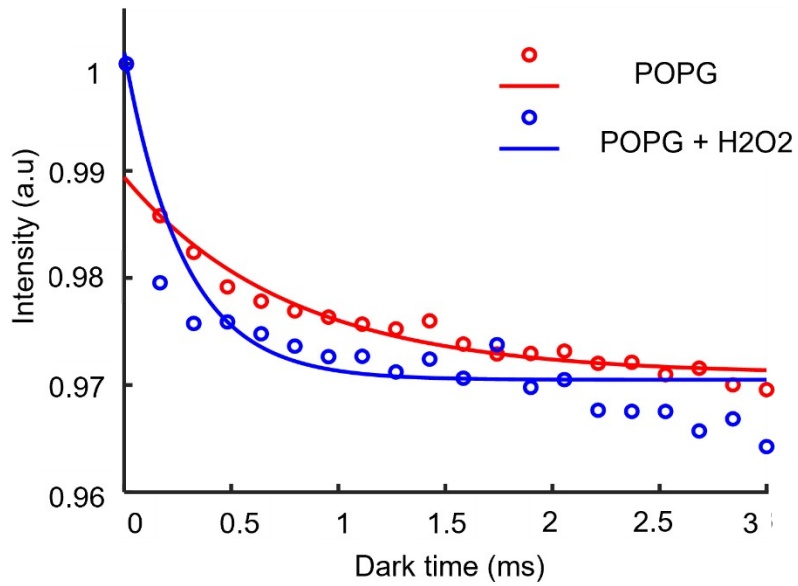

Figure S3: Relaxometry curves for the POPG measurements (Data in dots, exponential fit in the continuous line).

## 2. Particle size

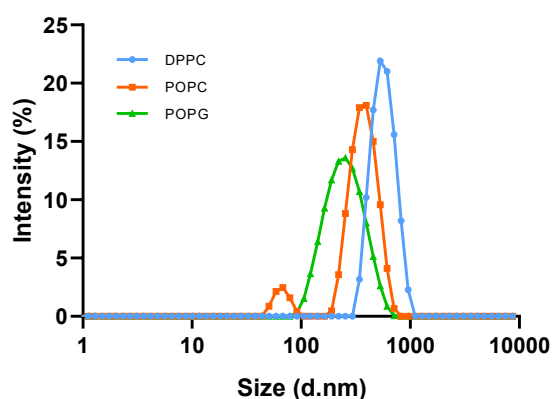

Figure S4. Size distribution of lipid particles measured by DLS

|      | Z-average /nm | PDI   |
|------|---------------|-------|
| DPPC | 607.8         | 0.248 |
| POPC | 371.8         | 0.400 |
| POPG | 223.7         | 0.214 |

## 3. Surface coverage for the different membrane types

Surface coverage: Fluorescently labelled liposomes were imaged using confocal microscopy (see main manuscript). The image analysis was done using FIJI. 4 areas of 40\*40  $\mu\text{m}^2$  were selected randomly. A threshold of 124 was selected to differentiate liposomes from uncovered area.

Percentage of Surface coverage = covered area of liposomes / 40\*40  $\mu\text{m}^2$  100%

Statistics: using T-test of Mann-Whitney for two groups by GraphPad Prism 8.0.1

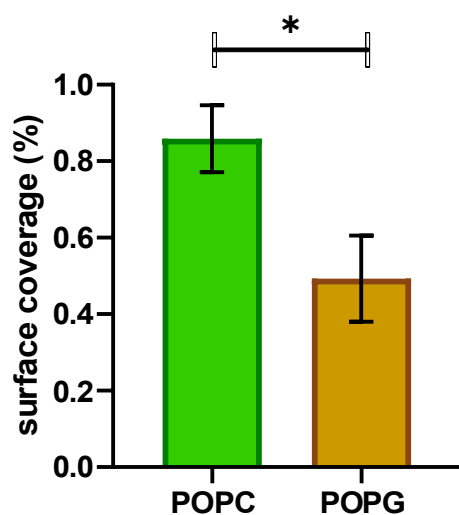

Figure S5. Surface coverage for different lipid membranes of the diamond surface. (n=4)
